# Supplementary material
Source: PubMed Central journal article supplement (PMC4695972)
Supplement: NIHMS739755-supplement-Supplementary_Information.pdf [file NIHMS739755-supplement-Supplementary_Information.pdf]

## Supplemental Material

### Disruption and eradication of *P. aeruginosa* biofilms using nitric oxide-releasing chitosan oligosaccharides

Katelyn P. Reighard,<sup>a</sup> David B. Hill,<sup>b,c</sup> Graham A. Dixon,<sup>b</sup> Brittany Worley,<sup>a</sup> and Mark H. Schoenfisch<sup>a\*</sup>

<sup>a</sup>Department of Chemistry, University of North Carolina at Chapel Hill, Chapel Hill, NC

<sup>b</sup>The Marsico Lung Institute, University of North Carolina at Chapel Hill, Chapel Hill, NC

<sup>c</sup>Department of Physics and Astronomy, University of North Carolina at Chapel Hill, Chapel Hill, NC

\*Corresponding author. Email: [schoenfisch@unc.edu](mailto:schoenfisch@unc.edu)

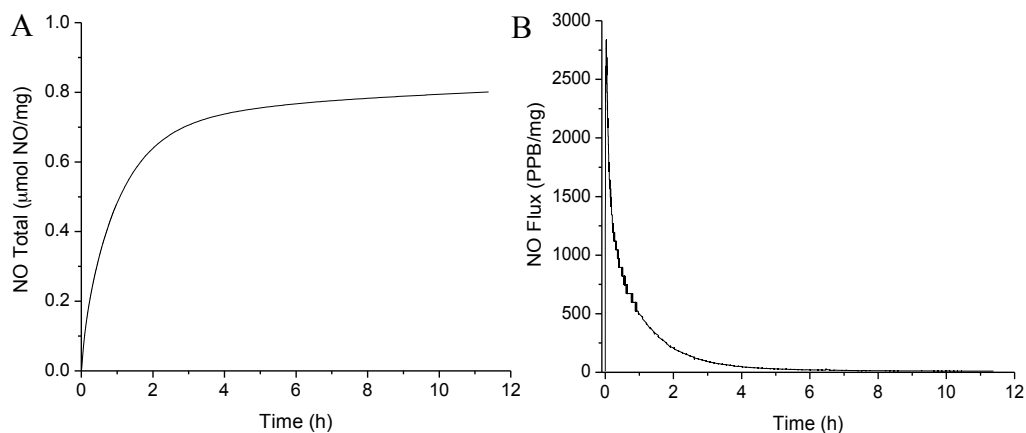

**Figure S1.** Chemiluminescence detection of NO release from COS-NO. The NO release from 1 mg of COS-NO was determined in deoxygenated PBS (pH 6.5) for comparison with other NO-releasing systems. The (A) NO total and (B) NO flux of representative measurements are shown.

**Table S1.** Nitric oxide-release properties of COS-NO in PBS (pH 6.5, 37 °C) as determined by chemiluminescence detection. Values are presented as means  $\pm$  standard deviations for n=3 pooled experiments.

| NO Total<br>( $\mu\text{mol NO/mg COS-NO}$ ) | Duration<br>(h) | Half-Life<br>(h) | Max Flux<br>(PPB/mg) |
|----------------------------------------------|-----------------|------------------|----------------------|
| $0.78 \pm 0.09$                              | $10.7 \pm 1.1$  | $0.62 \pm 0.08$  | $3200 \pm 600$       |

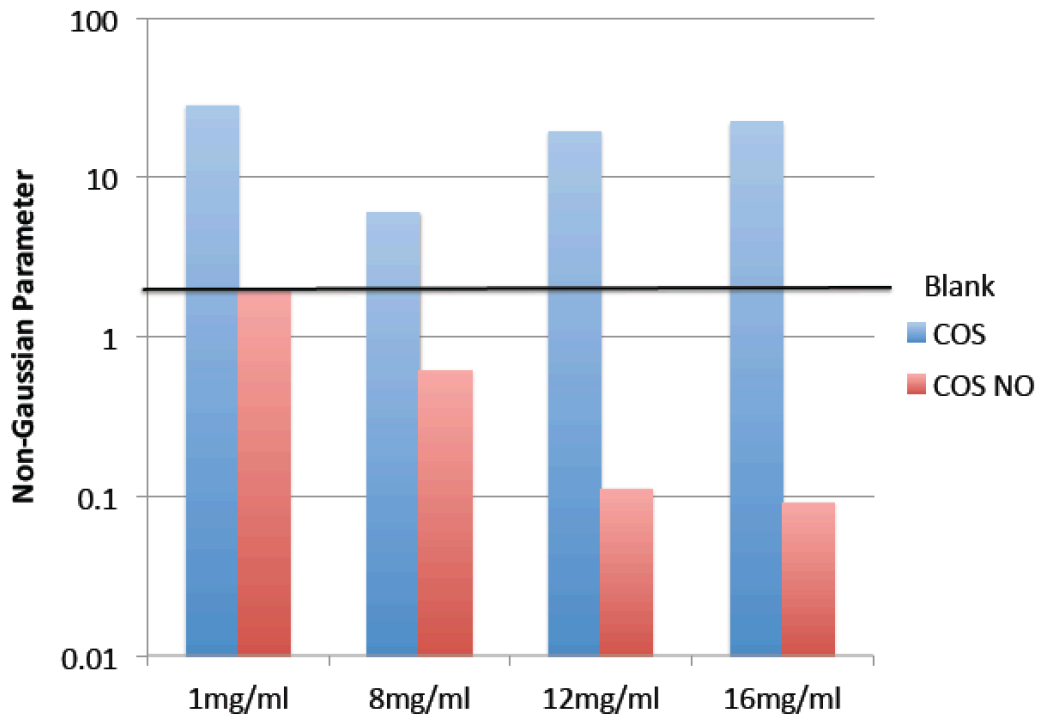

**Figure S2. Non-Gaussian Parameter.** The non-Gaussian Parameter was calculated for muciod “blank”, untreated biofilms (black line), COS (Blue) and COS-NO(Red) treated biofilms using the formulation present by Vorselaars et al. (2007) where:

$$NGP = \frac{\langle \Delta r^4 \rangle}{2 \langle \Delta r^2 \rangle^2} - 1$$

Vorselaars B, Lyulin AV, Karatasos K, Michels M. 2007. Non-Gaussian nature of glassy dynamics by cage to cage motion. Phys Rev E. 75:011504.
